# Supplementary material for: Mortality from snakebite envenomation: an analysis from the Global Burden of Disease Study 2019
Source: Research Square preprint supplement (doi:10.21203/rs.3.rs-1021472/v1), 2021-11-09
Supplement: Supplementary file 1 [file 37dfb9e3dad8b4266d91e58f.pdf]

# 1 Supplementary Appendix

## 2 Methods appendix

### 3 Model Covariates

4 The cause of death ensemble modelling (CODEm) approach used in GBD allows us to try multiple  
5 covariates that we believe to be significant with the rate of snakebite death, and CODEm uses feature  
6 selection to pick out only the best combinations of covariates based on out-of-sample RMSE validation.

7 The covariates used in the GBD 2019 venomous animal contact CODEm model and their prior direction  
8 are below in Table 1, along with the same covariates and their direction used in the species-specific  
9 models. Directions differ for some priors because of uncertainty that a prior direction would be true for  
10 all five venomous species models. For example, we have a strong prior that the rate of scorpion bites  
11 would decrease with rainfall, but we do not have this strong negative prior for snakes and believe it  
12 could be a positive association.

13 **Appendix Table 1.** Covariates used in the five ST-GPR models and the general GBD 2019 model.  
14 Directions represent priors set on the beta coefficients to ensure their direction is as expected.

| Covariate                                                               | GBD 2019 direction | Species-specific direction |
|-------------------------------------------------------------------------|--------------------|----------------------------|
| Healthcare Access and Quality Index                                     | -1                 | -1                         |
| Rainfall population-weighted (mm/yr)                                    | 1                  | 0                          |
| Urbanicity                                                              | -1                 | -1                         |
| Proportion of population involved in agricultural activities            | 1                  | 1                          |
| Population-weighted mean temperature                                    | 1                  | 0                          |
| Socio-demographic Index                                                 | -1                 | -1                         |
| Absolute value of average latitude                                      | -1                 | 0                          |
| Education (years per capita)                                            | -1                 | -1                         |
| Elevation over 1500m (proportion)                                       | -1                 | 0                          |
| Elevation under 100m (proportion)                                       | -1                 | 0                          |
| Log-transformed age-standardised SEV scalar: venom                      | 1                  | 1                          |
| Population density (over 1000 ppl/sqkm, proportion)                     | -1                 | -1                         |
| Population density (under 150 ppl/sqkm, proportion)                     | 1                  | 1                          |
| LDI (I\$ per capita)                                                    | -1                 | -1                         |
| Proportion of population vulnerable to venomous snakebites <sup>a</sup> | 1                  | 1                          |
| Mean number of venomous snake species <sup>a</sup>                      | 1                  | 1                          |

15 a: These covariates were only used in the mortality from venomous snakes model, not the other four  
 16 species. They were extracted from data used by Longbottom et al.<sup>1</sup> LDI=lag-distributed income.  
 17 SEV=summary exposure value. ST-GPR=spatiotemporal Gaussian process regression.

18 [Years of life lived residual life expectancy](#)

19 Years of life lived (YLLs) are defined as the difference between life expectancy and the age at which a  
 20 death occurs, based on life tables used in GBD 2019 that estimate the remaining life expectancy for each  
 21 five-year age group in all populations greater than 5 million in GBD 2019. Table 2 shows the life  
 22 expectancy used in YLL calculations for GBD 2019.

23 **Appendix Table 2.** Residual years of life lost from a death for each age group. Residual life expectancy is  
 24 based on the maximum life expectancy globally.

| Age | Residual life expectancy (years) |
|-----|----------------------------------|
| 0   | 87.9                             |
| 1   | 87.0                             |
| 5   | 83.0                             |
| 10  | 78.1                             |
| 15  | 73.1                             |
| 20  | 68.1                             |
| 25  | 63.2                             |
| 30  | 58.2                             |
| 35  | 53.3                             |
| 40  | 48.4                             |
| 45  | 43.5                             |
| 50  | 38.7                             |
| 55  | 34.0                             |
| 60  | 29.3                             |
| 65  | 24.7                             |
| 70  | 20.3                             |
| 75  | 16.1                             |
| 80  | 12.2                             |
| 85  | 8.8                              |
| 90  | 6.1                              |
| 95  | 3.9                              |
| 100 | 2.2                              |
| 105 | 1.6                              |
| 110 | 1.4                              |

25  
 26 [Venom-specific ICD codes](#)

27 The ICD codes used for data extraction of vital registration and verbal autopsy data are in Table 3. The  
 28 table includes the garbage codes used for redistribution, which were either not coded in enough detail  
 29 to indicate a species (E905) or coded for “Contact with unspecified venomous animal or plant” (E905.9x

30 and X29.x). These codes were redistributed based on the distribution of correctly coded deaths in a  
 31 country, sex, or age group.

32  
 33 **Appendix Table 3:** ICD codes used for venomous species-specific analysis. Trailing x's represent any  
 34 value that trails the non-x characters, because every ICD code within the ICD categories was used.

| Venomous animal                                                              | ICD-9                                          | ICD-10                               |
|------------------------------------------------------------------------------|------------------------------------------------|--------------------------------------|
| Snake                                                                        | E905.0x                                        | X20.x                                |
| Spider                                                                       | E905.1x                                        | X21.x                                |
| Scorpion                                                                     | E905.2x                                        | X22.x                                |
| Bees                                                                         | E905.3x                                        | X23.x                                |
| Other                                                                        | E905.4x; E905.5x;<br>E905.6x; E905.7x; E905.8x | X24.x; X25.x; X26.x; X27.x;<br>X28.x |
| Unspecified venomous animal (Considered as garbage codes for redistribution) | E905; E905.9x;                                 | X29.x                                |

35  
 36 **Garbage code redistribution**  
 37 Deaths due to unspecified venomous animals were redistributed to each animal category above based  
 38 on the distribution of animal-specific deaths by age, sex, and location. Out of 69,097 deaths that could  
 39 be coded to the ICD codes above, 5,711 (8.3%) were coded to unspecified venomous animal contact and  
 40 needed to be redistributed. Redistribution was done by aggregating all properly coded deaths by  
 41 location, age, sex, and animal, and applying the proportion of correctly coded deaths due to each animal  
 42 to the number of deaths coded for unspecified venomous animal contact. These redistributed animal  
 43 deaths were added onto the number of properly coded deaths for each animal.

44 If a location-age-sex group had more incorrectly coded deaths that needed to be redistributed than  
 45 properly coded deaths across all five animal groups, then we aggregated based on a broader  
 46 demographic in order to have a more stable proportion for redistribution. First, we aggregated the  
 47 codes by only location and age, and applied these proportions to the location-age-sex groups where  
 48 there were sufficiently properly coded deaths by location and age, but not when stratified by sex. If  
 49 there were still insufficient deaths when disregarding sex, we aggregated across all ages and both sexes  
 50 within a location and applied that proportion. If there were still more deaths needed for redistribution  
 51 than properly coded deaths in a location, we aggregated deaths over GBD region to estimate the  
 52 proportion of deaths due to each animal and applied that proportion to the redistributed deaths.

53 There were 27,020 deaths properly coded for snakebites. After redistribution, there were 29,040 deaths  
54 attributable to snakebites, an increase of 7.5%.

55 **Input data sources**

56 Supplementary appendix Figure 1 shows the coverage of vital registration and verbal autopsy used in  
57 this analysis. Verbal autopsy has been shown to have high sensitivity and specificity for snakebites and  
58 venomous animal contact deaths.<sup>2</sup> We also used the WHO Venomous Snake Distribution maps<sup>3</sup> to  
59 decrease the proportion of deaths due to venomous snakebite to zero in countries without endemic  
60 venomous snakes of medical importance (Supplementary appendix Table 4).

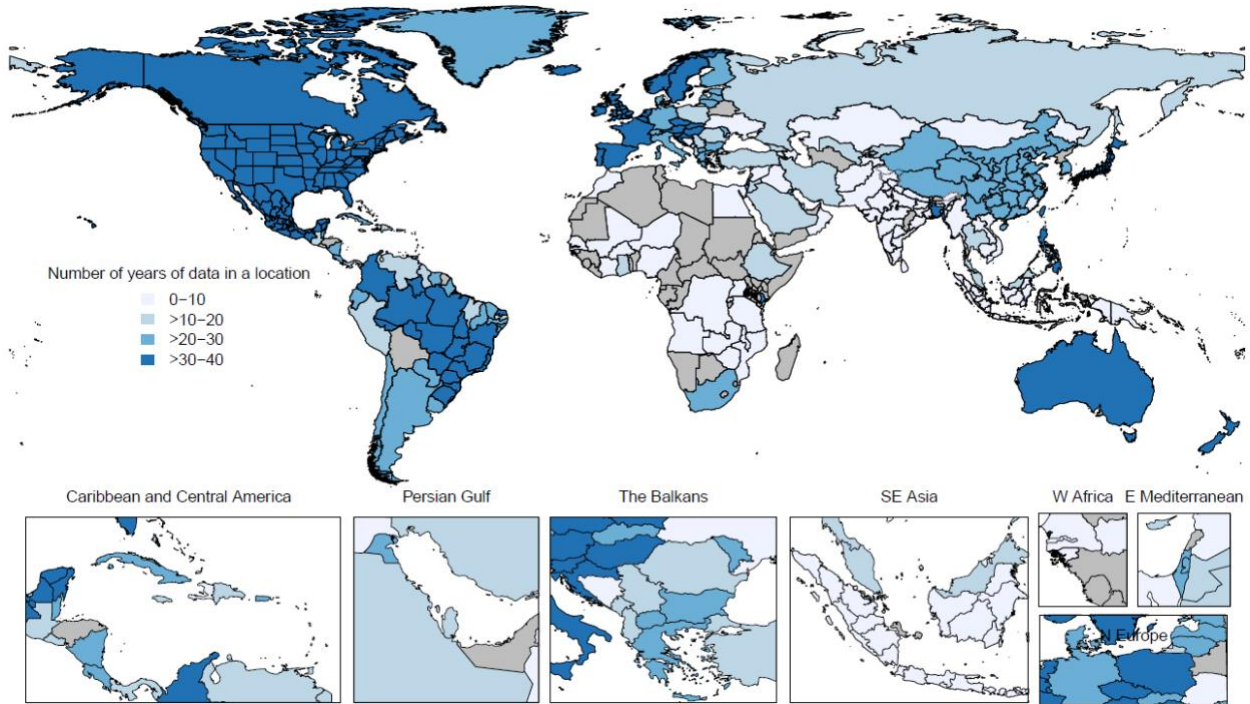

61  
62 **Appendix Figure 1:** Data used in the venomous animal contact CODEm model. Gray represents countries  
63 with no data.

64

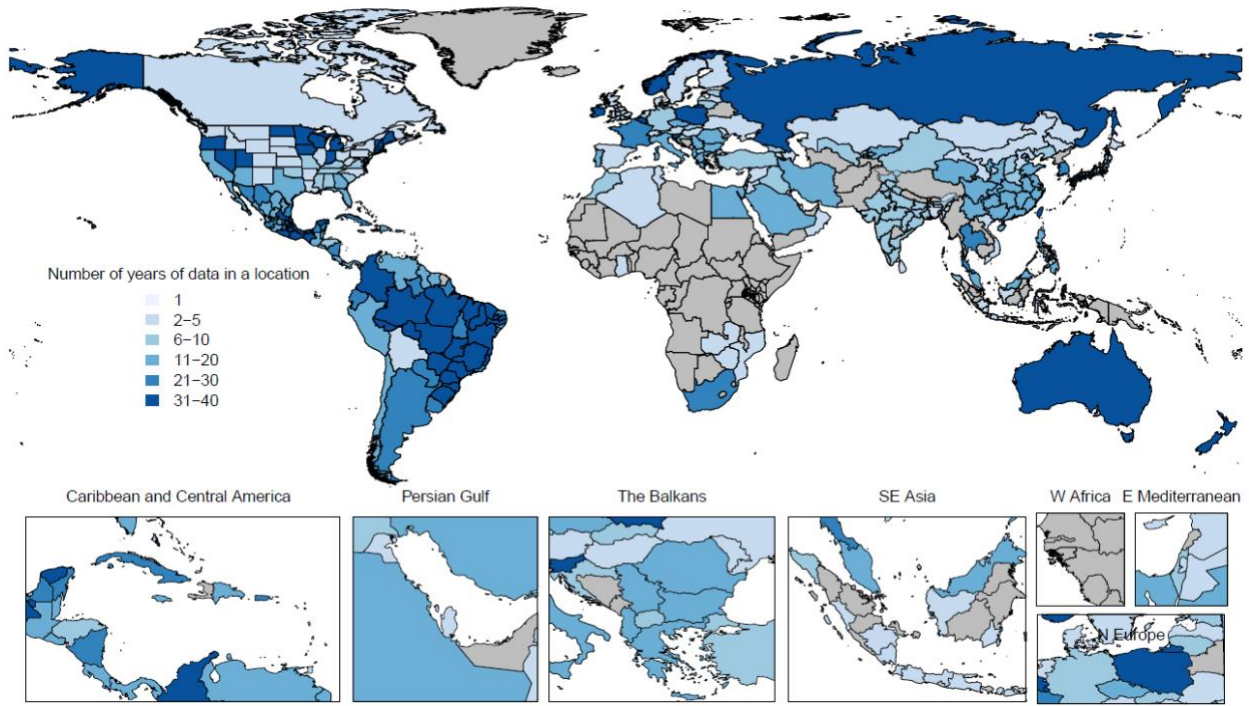

65

66 **Appendix Figure 2:** Count of unique location-years of data by location, used in the snakebite-specific  
 67 model.

68

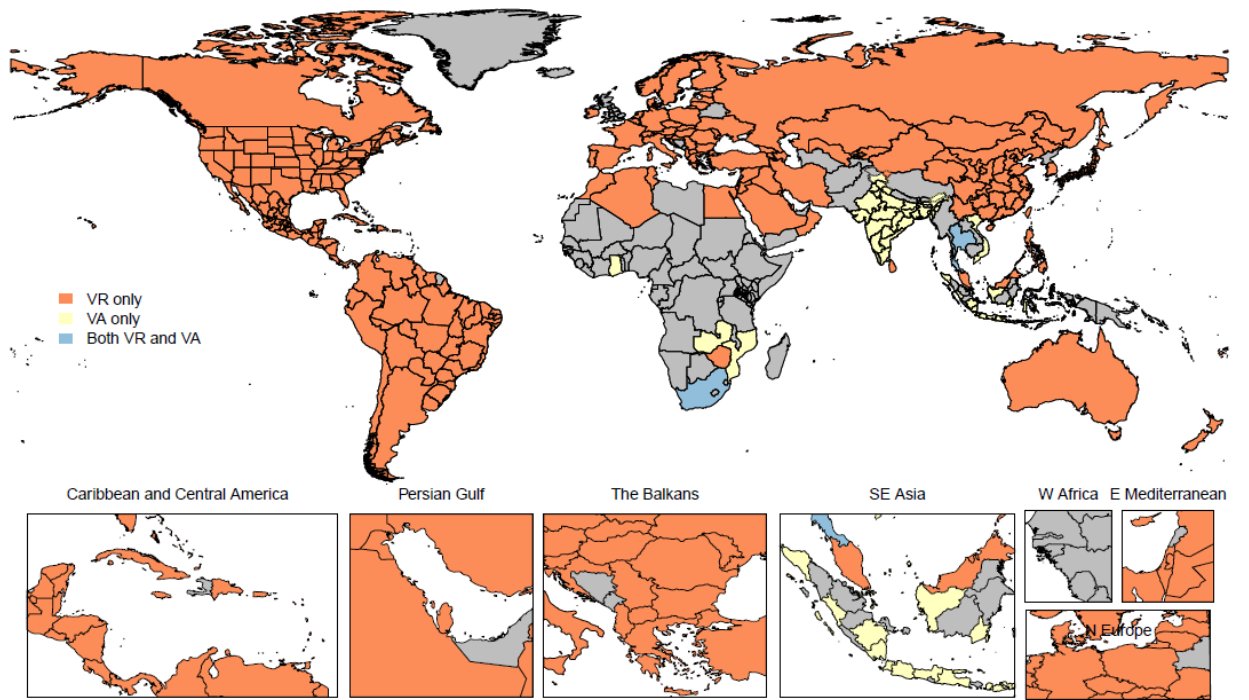

69

70 **Appendix Figure 3:** Map of vital registration (VR) and verbal autopsy (VA) data coverage used in the  
71 snakebite-specific model. Locations in gray do not have a single source of data.

72

73 **Appendix Table 4:** Locations where there are no endemic venomous snakes. Proportions in these  
74 locations were decreased to zero.

|                                  |
|----------------------------------|
| American Samoa                   |
| Antigua and Barbuda              |
| Barbados                         |
| Bermuda                          |
| Cape Verde                       |
| Chile                            |
| Comoros                          |
| Cook Islands                     |
| Cuba                             |
| Dominica                         |
| Dominican Republic               |
| Federated States of Micronesia   |
| Fiji                             |
| Greenland                        |
| Grenada                          |
| Guam                             |
| Haiti                            |
| Iceland                          |
| Ireland                          |
| Jamaica                          |
| Kiribati                         |
| Madagascar                       |
| Maldives                         |
| Malta                            |
| Marshall Islands                 |
| Mauritius                        |
| Monaco                           |
| Nauru                            |
| New Zealand                      |
| Niue                             |
| Northern Mariana Islands         |
| Palau                            |
| Puerto Rico                      |
| Saint Kitts and Nevis            |
| Saint Vincent and the Grenadines |
| Samoa                            |
| Seychelles                       |
| Solomon Islands                  |

|                |
|----------------|
| The Bahamas    |
| Tokelau        |
| Tonga          |
| Tuvalu         |
| Vanuatu        |
| Virgin Islands |

75

76 ST-GPR parameters

77 Spatiotemporal Gaussian process regression (ST-GPR) has three different hyperparameters that are set  
 78 to control the amount of temporal, age, and spatial smoothing. Time smoothing follows Equation 1,  
 79 where  $j$  is the observed data point and  $l$  is the country-year-age-sex to be predicted. We set  $\lambda$  to be  
 80 equal to 0.1, causing a high amount of smoothing over time due to a prior expectation that the burden  
 81 of snakebite would not have significant change year to year.

82 
$$Eq. 1: w_t = e^{-\lambda|time_i - time_j|}$$

83 Age weighting follows equation 2, where  $j$  is an observed data point,  $l$  is a country-year-age-sex point to  
 84 be predicted, and  $\omega$  is the set hyperparameter. We set  $\omega$  to be 0.5, establishing a medium rate of  
 85 smoothing over age to allow some effect while also giving ST-GPR the flexibility to follow data points  
 86 closely.

87 
$$Eq. 2: age\ weight_{i,j} = \omega$$

88

89 Space weighting follows Eq. 3 below. We set  $\zeta$  equal to 0.01, creating very little smoothing between  
 90 countries and subnational locations. We believed there would be significant variation between countries  
 91 due to ecology, health system strength, and other characteristics, and we allowed ST-GPR to follow the  
 92 trends in a given location when provided with data to do so.

93 
$$Eq. 3: Space\ weight = \begin{cases} \zeta^0 = 1 & \text{for residuals within country } i \\ \zeta^1 & \text{for residuals within region } j \text{ but not country } i \\ \zeta^2 & \text{for residuals not in region } j \end{cases}$$

94

95 ST-GPR ensemble model hybridization results for covariate selection

96 The covariates and their resulting coefficient of the ensemble model are shown below. Each sex is  
 97 modeled independently. Standardised coefficients allow easy comparisons between covariates on very  
 98 different scales. The mixed-effects model with nested random effects using GBD regions and data input  
 99 locations is described below:

100 
$$Snakebite\ mortality\ rate\ per\ 100,000 \sim covariates + (1|GBD\ region/location)$$

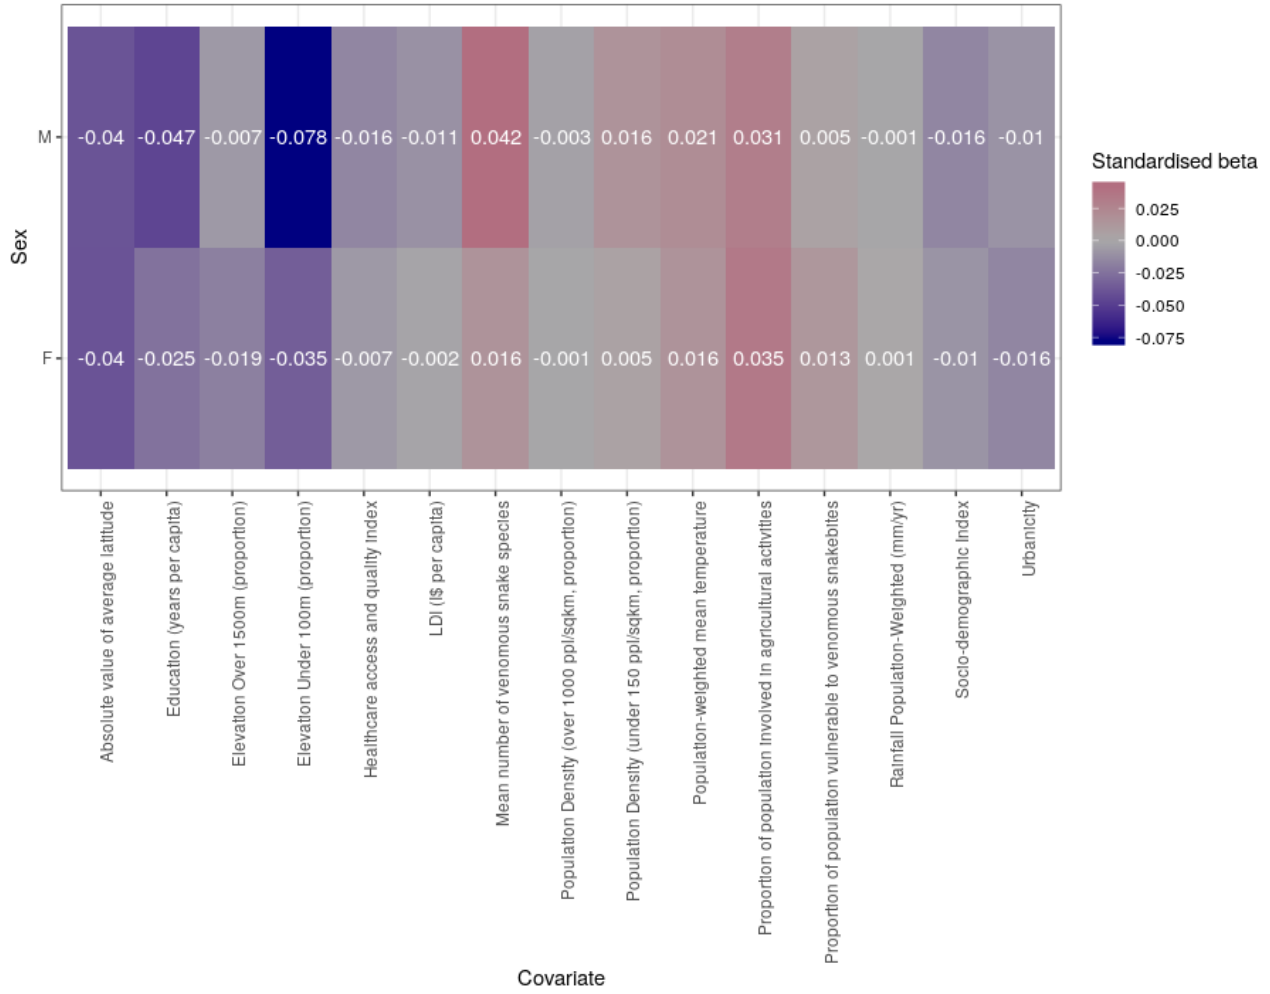

102

103

**Appendix Figure 4:** Standardised weighted beta coefficients of the 16 covariates used in the ensemble modelling approach. Standardised coefficients are equal to the beta coefficient per unit of the variable times the standard deviation of the covariates over the standard deviation of the input data:

104

105

$$\beta_{standardized} = \frac{\beta_{untransformed} * \sigma_{covariate}}{\sigma_{snakebite mortality rate per 100,000}}$$

106

107

108 Supplementary results

109 **Appendix Figure 5:** Age-standardised YLLs due to snakebites in 2019 for both sexes combined. GBD 2019  
 110 did not publish state-level estimates for China, and each state is colored the estimate of the rate of  
 111 China's national estimate. Endemic habitat of venomous snakes of medical importance was looked up  
 112 from the WHO venomous snake distribution maps:

113 <https://apps.who.int/bloodproducts/snakeantivenoms/database/default.htm>.

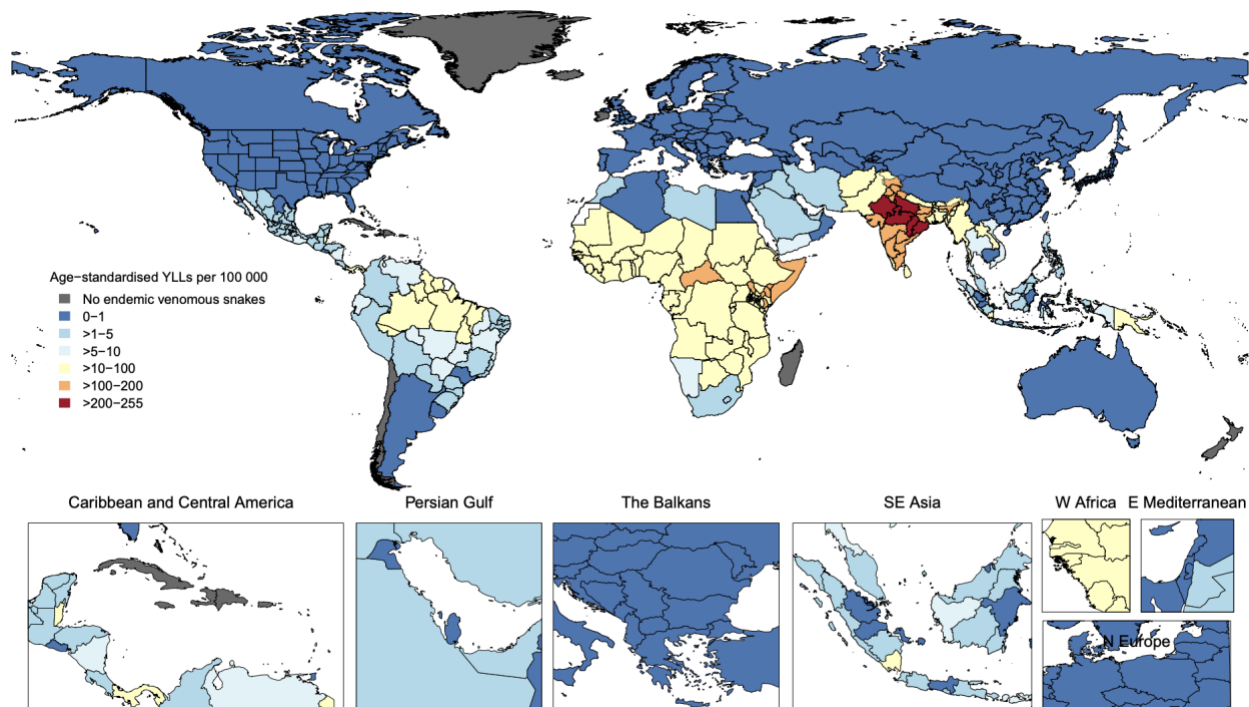

114

115

116 **Appendix Table 5:** Venomous snakebite deaths and YLLs in India and its states in 2019.

| Location          | Deaths - Count, 2019   | Deaths - Age-standardised rate, 2019 | YLLs - Count, 2019          | YLLs - Age-standardised rate, 2019 |
|-------------------|------------------------|--------------------------------------|-----------------------------|------------------------------------|
| Andhra Pradesh    | 2,310 (1,190 to 3,110) | 4.19 (2.15 to 5.63)                  | 89,300 (47,800 to 122,000)  | 163 (87 to 223)                    |
| Arunachal Pradesh | 21 (15 to 42)          | 1.68 (1.22 to 3.27)                  | 1,030 (718 to 2,100)        | 66 (46 to 131)                     |
| Assam             | 768 (605 to 1,000)     | 2.44 (1.92 to 3.14)                  | 37,500 (29,200 to 49,900)   | 107 (84 to 141)                    |
| Bihar             | 3,760 (1,570 to 5,290) | 3.63 (1.53 to 5.05)                  | 190,000 (76,500 to 276,000) | 160 (65 to 229)                    |
| Chhattisgarh      | 1,810 (962 to 2,370)   | 6.50 (3.52 to 8.42)                  | 80,700 (44,300 to 108,000)  | 263 (143 to 349)                   |
| Delhi             | 211 (148 to 275)       | 1.22 (0.86 to 1.58)                  | 9,530 (6,860 to 12,600)     | 50 (36 to 67)                      |
| Goa               | 19 (14 to 25)          | 1.11 (0.81 to 1.48)                  | 673 (487 to 910)            | 41 (30 to 55)                      |
| Gujarat           | 2,730 (1,490 to 3,440) | 4.23 (2.29 to 5.34)                  | 124,000 (69,000 to 158,000) | 178 (99 to 228)                    |

|                            |                                  |                            |                                           |                        |
|----------------------------|----------------------------------|----------------------------|-------------------------------------------|------------------------|
| Haryana                    | 710 (535 to 891)                 | 2.62 (1.99 to 3.30)        | 33,300 (25,500 to 42,400)                 | 116 (88 to 148)        |
| Himachal Pradesh           | 268 (157 to 339)                 | 3.52 (2.04 to 4.44)        | 10,600 (6,170 to 13,500)                  | 138 (81 to 175)        |
| Jammu & Kashmir and Ladakh | 478 (172 to 623)                 | 3.97 (1.41 to 5.15)        | 21,800 (8,000 to 28,700)                  | 163 (59 to 214)        |
| Jharkhand                  | 1,040 (580 to 1,480)             | 3.20 (1.78 to 4.44)        | 46,600 (26,200 to 67,700)                 | 129 (73 to 186)        |
| Karnataka                  | 2,100 (1,590 to 2,600)           | 3.19 (2.40 to 3.94)        | 92,800 (70,800 to 115,000)                | 136 (104 to 168)       |
| Kerala                     | 307 (238 to 453)                 | 0.74 (0.58 to 1.13)        | 10,700 (8,230 to 17,100)                  | 28 (21 to 45)          |
| Madhya Pradesh             | 4,390 (2,470 to 5,790)           | 5.68 (3.08 to 7.39)        | 215,000 (125,000 to 289,000)              | 249 (141 to 332)       |
| Maharashtra                | 4,010 (2,390 to 5,070)           | 3.25 (1.95 to 4.08)        | 172,000 (106,000 to 214,000)              | 136 (85 to 170)        |
| Manipur                    | 35 (25 to 59)                    | 1.19 (0.85 to 2.00)        | 1,560 (1,090 to 2,620)                    | 47 (33 to 78)          |
| Meghalaya                  | 33 (22 to 63)                    | 1.29 (0.92 to 2.50)        | 1,580 (1,070 to 3,080)                    | 51 (35 to 97)          |
| Mizoram                    | 11 (6 to 29)                     | 1.05 (0.63 to 2.86)        | 490 (293 to 1,290)                        | 41 (25 to 107)         |
| Nagaland                   | 22 (17 to 31)                    | 1.49 (1.12 to 2.06)        | 1,060 (769 to 1,530)                      | 59 (44 to 83)          |
| Odisha                     | 2,250 (1,360 to 3,030)           | 5.00 (3.01 to 6.69)        | 103,000 (61,800 to 141,000)               | 222 (132 to 306)       |
| Other Union Territories    | 33 (22 to 49)                    | 0.94 (0.65 to 1.38)        | 1,310 (882 to 2,000)                      | 35 (24 to 53)          |
| Punjab                     | 881 (633 to 1,110)               | 2.78 (2.00 to 3.51)        | 37,100 (26,900 to 47,000)                 | 117 (85 to 146)        |
| Rajasthan                  | 4,070 (2,440 to 5,230)           | 5.80 (3.48 to 7.44)        | 205,000 (122,000 to 265,000)              | 261 (151 to 336)       |
| Sikkim                     | 7 (4 to 10)                      | 1.18 (0.77 to 1.71)        | 270 (175 to 411)                          | 44 (29 to 65)          |
| Tamil Nadu                 | 2,780 (1,720 to 3,530)           | 3.40 (2.13 to 4.30)        | 111,000 (74,700 to 141,000)               | 135 (91 to 171)        |
| Telangana                  | 1,550 (780 to 2,180)             | 4.38 (2.19 to 6.05)        | 64,900 (34,200 to 91,100)                 | 171 (89 to 239)        |
| Tripura                    | 26 (17 to 68)                    | 0.69 (0.46 to 1.77)        | 1,080 (700 to 2,860)                      | 27 (18 to 70)          |
| Uttar Pradesh              | 12,000 (5,230 to 16,100)         | 6.02 (2.60 to 7.99)        | 566,000 (252,000 to 784,000)              | 247 (109 to 337)       |
| Uttarakhand                | 423 (231 to 591)                 | 3.91 (2.16 to 5.46)        | 17,800 (10,200 to 24,700)                 | 153 (86 to 213)        |
| West Bengal                | 2,090 (1,220 to 2,730)           | 2.16 (1.23 to 2.81)        | 91,600 (54,200 to 120,000)                | 92 (54 to 122)         |
| <b>India</b>               | <b>51,100 (29,600 to 64,100)</b> | <b>4.00 (2.31 to 5.01)</b> | <b>2,340,000 (1,350,000 to 2,970,000)</b> | <b>171 (99 to 218)</b> |

117

118

119

120

**Appendix Table 6:** Regional forecast mortality forecasted to 2030, 2040, and 2050.

| Region                       | Deaths (Absolute number)  |                           |                           |                           |                            | Age-standardized mortality rate per 100,000 |                     |                     |                     |                     |
|------------------------------|---------------------------|---------------------------|---------------------------|---------------------------|----------------------------|---------------------------------------------|---------------------|---------------------|---------------------|---------------------|
|                              | 2019*                     | 2020                      | 2030                      | 2040                      | 2050                       | 2019*                                       | 2020                | 2030                | 2040                | 2050                |
| Andean Latin America         | 47 (16 to 60)             | 68 (15 to 83)             | 86 (12 to 112)            | 106 (10 to 149)           | 129 (7 to 199)             | 0.08 (0.03 to 0.10)                         | 0.11 (0.02 to 0.13) | 0.11 (0.02 to 0.15) | 0.12 (0.01 to 0.16) | 0.12 (0.01 to 0.18) |
| Australasia                  | 1 (1 to 2)                | 1 (1 to 1)                | 1 (1 to 1)                | 1 (1 to 1)                | 1 (0 to 1)                 | 0.00 (0.00 to 0.00)                         | 0.00 (0.00 to 0.00) | 0.00 (0.00 to 0.00) | 0.00 (0.00 to 0.00) | 0.00 (0.00 to 0.00) |
| Caribbean                    | 12 (9 to 15)              | 18 (14 to 21)             | 35 (24 to 44)             | 70 (42 to 94)             | 149 (74 to 216)            | 0.02 (0.02 to 0.03)                         | 0.04 (0.03 to 0.04) | 0.06 (0.04 to 0.07) | 0.10 (0.06 to 0.14) | 0.18 (0.09 to 0.26) |
| Central Asia                 | 9 (8 to 10)               | 10 (9 to 11)              | 9 (8 to 11)               | 8 (7 to 11)               | 8 (6 to 10)                | 0.01 (0.01 to 0.01)                         | 0.01 (0.01 to 0.01) | 0.01 (0.01 to 0.01) | 0.01 (0.01 to 0.01) | 0.01 (0.00 to 0.01) |
| Central Europe               | 5 (4 to 6)                | 6 (5 to 6)                | 5 (5 to 6)                | 5 (4 to 5)                | 4 (3 to 5)                 | 0.00 (0.00 to 0.00)                         | 0.00 (0.00 to 0.00) | 0.00 (0.00 to 0.00) | 0.00 (0.00 to 0.00) | 0.00 (0.00 to 0.00) |
| Central Latin America        | 210 (174 to 255)          | 189 (170 to 206)          | 147 (127 to 168)          | 112 (92 to 133)           | 83 (65 to 102)             | 0.09 (0.07 to 0.11)                         | 0.07 (0.07 to 0.08) | 0.05 (0.04 to 0.05) | 0.03 (0.03 to 0.04) | 0.02 (0.02 to 0.02) |
| Central Sub-Saharan Africa   | 791 (507 to 1,355)        | 883 (564 to 1,579)        | 1,164 (656 to 2,416)      | 1,535 (752 to 3,840)      | 2,039 (853 to 6,028)       | 1.25 (0.83 to 1.82)                         | 1.26 (0.84 to 2.05) | 1.18 (0.68 to 2.40) | 1.13 (0.57 to 2.71) | 1.09 (0.47 to 3.09) |
| East Asia                    | 230 (176 to 280)          | 145 (128 to 191)          | 85 (69 to 159)            | 48 (35 to 124)            | 26 (17 to 90)              | 0.01 (0.01 to 0.01)                         | 0.01 (0.01 to 0.01) | 0.00 (0.00 to 0.01) | 0.00 (0.00 to 0.00) | 0.00 (0.00 to 0.00) |
| Eastern Europe               | 22 (19 to 26)             | 19 (18 to 21)             | 13 (12 to 15)             | 9 (8 to 10)               | 6 (5 to 7)                 | 0.01 (0.01 to 0.01)                         | 0.01 (0.01 to 0.01) | 0.01 (0.00 to 0.01) | 0.00 (0.00 to 0.00) | 0.00 (0.00 to 0.00) |
| Eastern Sub-Saharan Africa   | 2,102 (1,573 to 3,002)    | 2,208 (1,634 to 3,116)    | 2,591 (1,819 to 3,955)    | 3,109 (2,051 to 5,205)    | 3,738 (2,268 to 6,771)     | 1.19 (0.83 to 1.61)                         | 1.10 (0.79 to 1.54) | 0.90 (0.62 to 1.36) | 0.74 (0.48 to 1.22) | 0.61 (0.37 to 1.09) |
| High-income Asia Pacific     | 9 (7 to 11)               | 8 (6 to 9)                | 6 (4 to 7)                | 4 (3 to 5)                | 3 (2 to 4)                 | 0.00 (0.00 to 0.00)                         | 0.00 (0.00 to 0.00) | 0.00 (0.00 to 0.00) | 0.00 (0.00 to 0.00) | 0.00 (0.00 to 0.00) |
| High-income North America    | 17 (16 to 19)             | 16 (14 to 17)             | 16 (14 to 17)             | 15 (14 to 17)             | 15 (13 to 17)              | 0.00 (0.00 to 0.00)                         | 0.00 (0.00 to 0.00) | 0.00 (0.00 to 0.00) | 0.00 (0.00 to 0.00) | 0.00 (0.00 to 0.00) |
| North Africa and Middle East | 350 (243 to 485)          | 379 (272 to 493)          | 326 (226 to 478)          | 283 (180 to 468)          | 246 (140 to 460)           | 0.06 (0.05 to 0.09)                         | 0.06 (0.05 to 0.08) | 0.05 (0.03 to 0.07) | 0.04 (0.02 to 0.06) | 0.03 (0.02 to 0.05) |
| Oceania                      | 69 (40 to 108)            | 77 (42 to 116)            | 90 (47 to 140)            | 106 (54 to 171)           | 125 (59 to 217)            | 0.65 (0.38 to 1.03)                         | 0.64 (0.36 to 1.00) | 0.63 (0.34 to 0.99) | 0.62 (0.31 to 1.00) | 0.61 (0.29 to 1.06) |
| South Asia                   | 54,588 (31,838 to 68,321) | 60,538 (34,100 to 75,645) | 58,433 (32,577 to 85,624) | 56,447 (30,908 to 95,744) | 54,241 (28,352 to 106,833) | 3.37 (1.96 to 4.19)                         | 3.64 (2.06 to 4.56) | 3.03 (1.70 to 4.45) | 2.55 (1.41 to 4.33) | 2.17 (1.14 to 4.27) |

|                             |                                      |                                      |                                      |                                       |                                       |                                |                                |                                |                                |                                |
|-----------------------------|--------------------------------------|--------------------------------------|--------------------------------------|---------------------------------------|---------------------------------------|--------------------------------|--------------------------------|--------------------------------|--------------------------------|--------------------------------|
| Southeast Asia              | 801<br>(581 to 961)                  | 840<br>(603 to 968)                  | 689<br>(500 to 870)                  | 557 (395 to 791)                      | 438 (287 to 693)                      | 0.14<br>(0.10 to 0.16)         | 0.14<br>(0.10 to 0.16)         | 0.09<br>(0.07 to 0.12)         | 0.06<br>(0.04 to 0.09)         | 0.04<br>(0.03 to 0.07)         |
| Southern Latin America      | 3 (3 to 4)                           | 5 (4 to 5)                           | 8 (6 to 9)                           | 12 (10 to 15)                         | 18 (14 to 24)                         | 0.00<br>(0.00 to 0.01)         | 0.01<br>(0.01 to 0.01)         | 0.01<br>(0.01 to 0.01)         | 0.01<br>(0.01 to 0.02)         | 0.02<br>(0.01 to 0.02)         |
| Southern Sub-Saharan Africa | 71 (56 to 90)                        | 78 (62 to 98)                        | 90 (68 to 122)                       | 107 (76 to 152)                       | 127 (84 to 200)                       | 0.12<br>(0.09 to 0.15)         | 0.12<br>(0.10 to 0.15)         | 0.11<br>(0.09 to 0.15)         | 0.11<br>(0.08 to 0.15)         | 0.10<br>(0.07 to 0.16)         |
| Tropical Latin America      | 240<br>(224 to 261)                  | 204<br>(188 to 220)                  | 185<br>(165 to 208)                  | 164 (141 to 192)                      | 140 (115 to 171)                      | 0.11<br>(0.10 to 0.12)         | 0.09<br>(0.08 to 0.09)         | 0.06<br>(0.06 to 0.07)         | 0.05<br>(0.04 to 0.06)         | 0.04<br>(0.03 to 0.04)         |
| Western Europe              | 14 (12 to 15)                        | 14 (13 to 15)                        | 14 (13 to 15)                        | 14 (12 to 16)                         | 14 (12 to 15)                         | 0.00<br>(0.00 to 0.00)         |
| Western Sub-Saharan Africa  | 3,822<br>(2,682 to 6,000)            | 3,903<br>(2,756 to 5,900)            | 4,808<br>(3,093 to 8,106)            | 5,922<br>(3,548 to 10,915)            | 7,222<br>(3,935 to 14,706)            | 1.42<br>(1.03 to 2.06)         | 1.42<br>(1.01 to 2.10)         | 1.24<br>(0.81 to 2.03)         | 1.09<br>(0.65 to 1.97)         | 0.97<br>(0.53 to 1.95)         |
| <b>Global</b>               | <b>63,415<br/>(38,930 to 78,633)</b> | <b>69,608<br/>(42,094 to 86,040)</b> | <b>68,799<br/>(41,372 to 97,613)</b> | <b>68,633<br/>(40,347 to 111,231)</b> | <b>68,771<br/>(39,108 to 125,599)</b> | <b>0.81<br/>(0.50 to 1.00)</b> | <b>0.87<br/>(0.53 to 1.08)</b> | <b>0.75<br/>(0.45 to 1.07)</b> | <b>0.66<br/>(0.39 to 1.08)</b> | <b>0.59<br/>(0.34 to 1.08)</b> |

122 \*: 2019 data are our snakebite mortality estimates, while 2020, 2030, 2040, and 2050 estimates are the  
123 results of the forecasting model.

## GATHER checklist

| Item #                                                                                                | Checklist item                                                                                                                                                                                                                                                                                                                                                                            | Reported on page #                                                                                                                                                                                                                                                          |
|-------------------------------------------------------------------------------------------------------|-------------------------------------------------------------------------------------------------------------------------------------------------------------------------------------------------------------------------------------------------------------------------------------------------------------------------------------------------------------------------------------------|-----------------------------------------------------------------------------------------------------------------------------------------------------------------------------------------------------------------------------------------------------------------------------|
| <b>Objectives and funding</b>                                                                         |                                                                                                                                                                                                                                                                                                                                                                                           |                                                                                                                                                                                                                                                                             |
| 1                                                                                                     | Define the indicator(s), populations (including age, sex, and geographic entities), and time period(s) for which estimates were made.                                                                                                                                                                                                                                                     | Main text (Methods)                                                                                                                                                                                                                                                         |
| 2                                                                                                     | List the funding sources for the work.                                                                                                                                                                                                                                                                                                                                                    | Abstract (Funding),<br>Acknowledgments                                                                                                                                                                                                                                      |
| <b>Data Inputs</b>                                                                                    |                                                                                                                                                                                                                                                                                                                                                                                           |                                                                                                                                                                                                                                                                             |
| <i>For all data inputs from multiple sources that are synthesized as part of the study:</i>           |                                                                                                                                                                                                                                                                                                                                                                                           |                                                                                                                                                                                                                                                                             |
| 3                                                                                                     | Describe how the data were identified and how the data were accessed.                                                                                                                                                                                                                                                                                                                     | Main manuscript methods and appendix                                                                                                                                                                                                                                        |
| 4                                                                                                     | Specify the inclusion and exclusion criteria. Identify all ad-hoc exclusions.                                                                                                                                                                                                                                                                                                             | Main manuscript methods and appendix                                                                                                                                                                                                                                        |
| 5                                                                                                     | Provide information on all included data sources and their main characteristics. For each data source used, report reference information or contact name/institution, population represented, data collection method, year(s) of data collection, sex and age range, diagnostic criteria or measurement method, and sample size, as relevant.                                             | Main manuscript methods and appendix Sections 3-4. Detailed data sources for each component available online at GBD Input Data Sources Tool ( <a href="http://ghdx.healthdata.org/gbd-2019/data-input-sources">http://ghdx.healthdata.org/gbd-2019/data-input-sources</a> ) |
| 6                                                                                                     | Identify and describe any categories of input data that have potentially important biases (e.g., based on characteristics listed in item 5).                                                                                                                                                                                                                                              | Main manuscript methods and appendix                                                                                                                                                                                                                                        |
| <i>For data inputs that contribute to the analysis but were not synthesized as part of the study:</i> |                                                                                                                                                                                                                                                                                                                                                                                           |                                                                                                                                                                                                                                                                             |
| 7                                                                                                     | Describe and give sources for any other data inputs.                                                                                                                                                                                                                                                                                                                                      | Main manuscript methods and appendix                                                                                                                                                                                                                                        |
| <i>For all data inputs:</i>                                                                           |                                                                                                                                                                                                                                                                                                                                                                                           |                                                                                                                                                                                                                                                                             |
| 8                                                                                                     | Provide all data inputs in a file format from which data can be efficiently extracted (e.g., a spreadsheet rather than a PDF), including all relevant meta-data listed in item 5. For any data inputs that cannot be shared because of ethical or legal reasons, such as third-party ownership, provide a contact name or the name of the institution that retains the right to the data. | Detailed data sources for each component available online ( <a href="https://ghdx.healthdata.org/gbd-2019">https://ghdx.healthdata.org/gbd-2019</a> )                                                                                                                       |
| <b>Data analysis</b>                                                                                  |                                                                                                                                                                                                                                                                                                                                                                                           |                                                                                                                                                                                                                                                                             |
| 9                                                                                                     | Provide a conceptual overview of the data analysis method. A diagram may be helpful.                                                                                                                                                                                                                                                                                                      | Manuscript methods and appendix                                                                                                                                                                                                                                             |
| 10                                                                                                    | Provide a detailed description of all steps of the analysis, including mathematical formulae. This description should cover, as relevant, data cleaning, data pre-processing, data adjustments and weighting of data sources, and mathematical or statistical model(s).                                                                                                                   | Manuscript methods and appendix                                                                                                                                                                                                                                             |
| 11                                                                                                    | Describe how candidate models were evaluated and how the final model(s) were selected.                                                                                                                                                                                                                                                                                                    | Manuscript methods and appendix                                                                                                                                                                                                                                             |
| 12                                                                                                    | Provide the results of an evaluation of model performance, if done, as well as the results of any relevant sensitivity analysis.                                                                                                                                                                                                                                                          |                                                                                                                                                                                                                                                                             |

|                               |                                                                                                                                                                  |                                                                                                                                                                                                                    |
|-------------------------------|------------------------------------------------------------------------------------------------------------------------------------------------------------------|--------------------------------------------------------------------------------------------------------------------------------------------------------------------------------------------------------------------|
| <b>13</b>                     | Describe methods for calculating uncertainty of the estimates. State which sources of uncertainty were, and were not, accounted for in the uncertainty analysis. | Manuscript methods and appendix                                                                                                                                                                                    |
| <b>14</b>                     | State how analytic or statistical source code used to generate estimates can be accessed.                                                                        | Statistical code used in GBD is published on GitHub, including core modelling code for ST-GPR and CODEm                                                                                                            |
| <b>Results and Discussion</b> |                                                                                                                                                                  |                                                                                                                                                                                                                    |
| <b>15</b>                     | Provide published estimates in a file format from which data can be efficiently extracted.                                                                       | Main text, and GBD 2019 venomous animal contact are publicly available from the GHDx online results tool ( <a href="http://ghdx.healthdata.org/gbd-results-tool">http://ghdx.healthdata.org/gbd-results-tool</a> ) |
| <b>16</b>                     | Report a quantitative measure of the uncertainty of the estimates (e.g. uncertainty intervals).                                                                  | Main text estimates include 95% uncertainty intervals                                                                                                                                                              |
| <b>17</b>                     | Interpret results in light of existing evidence. If updating a previous set of estimates, describe the reasons for changes in estimates.                         | Main text discussion                                                                                                                                                                                               |
| <b>18</b>                     | Discuss limitations of the estimates. Include a discussion of any modelling assumptions or data limitations that affect interpretation of the estimates.         | Main text discussion                                                                                                                                                                                               |

125

## 126 Author Contributions

127 Managing the estimation or publications process

128 Nicholas L S Roberts, Erin B Hamilton, Mohsen Naghavi, Spencer L James, David M Pigott, Simon I Hay,  
129 Theo Vos, and Kanyin Liane Ong.

130 Writing the first draft of the manuscript

131 Nicholas L S Roberts, Rakhi Dandona, Lalit Dandona, Spencer L James, David M Pigott, Simon I Hay, Theo  
132 Vos, and Kanyin Liane Ong.

133 Primary responsibility for applying analytical methods to produce estimates

134 Nicholas L S Roberts, Emily K Johnson, and Scott M Zeng.

135 Primary responsibility for seeking, cataloguing, extracting, or cleaning data; designing or coding  
136 figures and tables

137 Nicholas L S Roberts, Emily K Johnson, Scott M Zeng, and Kanyin Liane Ong.

138 Providing data or critical feedback on data sources

139 Emily K Johnson, Amir Abdoli, Fares Alahdab, Catalina Liliana Andrei, Davood Anvari, Jalal Arabloo,  
140 Marcel Ausloos, Archith Bloor, Dinh-Toi Chu, Hoa Thi Do, Lucas Earl, Aziz Eftekhari, Farshad Farzadfar,  
141 Abhay Motiramji Gaidhane, Birhan Gebresillassie Gebregiorgis, Ahmad Ghashghaee, Mahaveer  
142 Golechha, Claudiu Herteliu, Mahalaqua Nazli Khatib, Roba Khundkar, Kewal Krishan, G Anil Kumar, Navid  
143 Manafi, Ritesh G Menezes, Ted R Miller, Ali H Mokdad, Francis NP Monteiro, Maryam Moradi, Cuong Tat

144 Nguyen, Huong Lan Thi Nguyen, Jagadish Rao Padubidri, Hai Quang Pham, Zahiruddin Quazi Syed, Vafa  
145 Rahimi-Movaghar, Sowmya J Rao, David Laith Rawaf, Salman Rawaf, Abdallah M Samy, Monika  
146 Sawhney, David C Schwebel, Subramanian Senthilkumaran, Masood Ali Shaikh, Valentin Yurievich  
147 Skryabin, Anna Aleksandrovna Skryabina, Amin Soheili, Mark A Stokes, Marcos Roberto Tovani-Palone,  
148 Bach Xuan Tran, Ravensara S Travillian, Mohsen Naghavi, Rakhi Dandona, Lalit Dandona, David M Pigott,  
149 Christopher J L Murray, and Kanyin Liane Ong.

#### 150 [Developing methods or computational machinery](#)

151 Erin B Hamilton, Davood Anvari, Xiaochen Dai, Aziz Eftekhari, Firooz Esmaeilzadeh, Abhay Motiramji  
152 Gaidhane, Mahalaqua Nazli Khatib, Abdollah Mohammadian-Hafshejani, Ali H Mokdad, Maryam Moradi,  
153 Zahiruddin Quazi Syed, Robert C Reiner Jr., Abdallah M Samy, Mohsen Naghavi, David M Pigott,  
154 Christopher J L Murray, Theo Vos, and Kanyin Liane Ong.

#### 155 [Providing critical feedback on methods or results](#)

156 Fares Alahdab, Vahid Alipour, Robert Ancuceanu, Catalina Liliana Andrei, Davood Anvari, Jalal Arabloo,  
157 Marcel Ausloos, Atalel Fentahun Awedew, Ashish D Badiye, Ashish Bhalla, Nikha Bhardwaj, Pankaj  
158 Bhardwaj, Soumyadeep Bhaumik, Ali Bijani, Archith Bolor, Tianji Cai, Dinh-Toi Chu, Xiaochen Dai,  
159 Abebaw Alemayehu Desta, Hoa Thi Do, Aziz Eftekhari, Firooz Esmaeilzadeh, Farshad Farzadfar, Irina Filip,  
160 Masoud Foroutan, Richard Charles Franklin, Abhay Motiramji Gaidhane, Birhan Gebresillassie  
161 Gebregiorgis, Berhe Gebremichael, Ahmad Ghashghaee, Mahaveer Golechha, Samer Hamidi, Syed  
162 Emdadul Haque, Khezar Hayat, Claudiu Herteliu, Olayinka Stephen Ilesanmi, M Mofizul Islam, Jagnoor  
163 Jagnoor, Tanuj Kanchan, Neeti Kapoor, Ejaz Ahmad Khan, Mahalaqua Nazli Khatib, Roba Khundkar,  
164 Kewal Krishan, G Anil Kumar, Nithin Kumar, Stephen S Lim, Venkatesh Maled, Navid Manafi, Laurie B  
165 Marczak, Ritesh G Menezes, Tuomo J Meretoja, Ted R Miller, Abdollah Mohammadian-Hafshejani, Ali H  
166 Mokdad, Francis NP Monteiro, Maryam Moradi, Cuong Tat Nguyen, Huong Lan Thi Nguyen, Samuel M  
167 Ostroff, Jagadish Rao Padubidri, Hai Quang Pham, Zahiruddin Quazi Syed, Navid Rabiee, Amir Radfar,  
168 Vafa Rahimi-Movaghar, Sowmya J Rao, Prateek Rastogi, David Laith Rawaf, Salman Rawaf, Abdallah M  
169 Samy, Monika Sawhney, David C Schwebel, Masood Ali Shaikh, Valentin Yurievich Skryabin, Anna  
170 Aleksandrovna Skryabina, Amin Soheili, Mark A Stokes, Rekha Thapar, Marcos Roberto Tovani-Palone,  
171 Bach Xuan Tran, Ravensara S Travillian, Diana Zuleika Velazquez, Zhi-Jiang Zhang, Mohsen Naghavi,  
172 Rakhi Dandona, Lalit Dandona, David M Pigott, Christopher J L Murray, Simon I Hay, Theo Vos, and  
173 Kanyin Liane Ong,

#### 174 [Drafting the work or revising is critically for important intellectual content](#)

175 Fares Alahdab, Robert Ancuceanu, Catalina Liliana Andrei, Jalal Arabloo, Marcel Ausloos, Shankar M  
176 Bakkannavar, Soumyadeep Bhaumik, Felix Carvalho, Dinh-Toi Chu, Rosa A S Couto, Hoa Thi Do, Aziz  
177 Eftekhari, Firooz Esmaeilzadeh, Eduarda Fernandes, Irina Filip, Masoud Foroutan, Abhay Motiramji  
178 Gaidhane, Berhe Gebremichael, Ahmad Ghashghaee, Claudiu Herteliu, Olayinka Stephen Ilesanmi,  
179 Jagnoor Jagnoor, Ejaz Ahmad Khan, Mahalaqua Nazli Khatib, Kewal Krishan, Iván Landires, Mohammed  
180 Madadin, Venkatesh Maled, Navid Manafi, Laurie B Marczak, Ritesh G Menezes, Tuomo J Meretoja, Ted  
181 R Miller, Abdollah Mohammadian-Hafshejani, Ali H Mokdad, Francis NP Monteiro, Maryam Moradi,  
182 Vinod C Nayak, Cuong Tat Nguyen, Huong Lan Thi Nguyen, Virginia Nuñez-Samudio, Jagadish Rao  
183 Padubidri, Hai Quang Pham, Marina Pinheiro, Majid Pirestani, Zahiruddin Quazi Syed, Navid Rabiee, Amir  
184 Radfar, Vafa Rahimi-Movaghar, Sowmya J Rao, David Laith Rawaf, Salman Rawaf, Amirhossein Sahebkar,

185 Abdallah M Samy, David C Schwebel, Valentin Yurievich Skryabin, Anna Aleksandrovna Skryabina, Mark  
186 A Stokes, Marcos Roberto Tovani-Palone, Bach Xuan Tran, Diana Zuleika Velazquez, Mohsen Naghavi,  
187 David M Pigott, Simon I Hay, Theo Vos, and Kanyin Liane Ong.

188 [Managing the overall research enterprise](#)

189 Ali H Mokdad, Mohsen Naghavi, Lalit Dandona, Christopher J L Murray, Simon I Hay, and Theo Vos.

190

191 **References**

192 1 Longbottom J, Shearer FM, Devine M, *et al.* Vulnerability to snakebite envenoming: a global mapping  
193 of hotspots. *The Lancet* 2018; **392**: 673–84.

194 2 Mohapatra B, Warrell DA, Suraweera W, *et al.* Snakebite Mortality in India: A Nationally  
195 Representative Mortality Survey. *PLoS Negl Trop Dis* 2011; **5**: e1018.

196 3 Venomous snakes distribution and species risk categories. Geneva: World Health Organization  
197 <https://apps.who.int/bloodproducts/snakeantivenoms/database/>.

198

199
